# Supplementary material for: Functional and Structural Brain Damage in Friedreich's Ataxia
Source: PubMed Central journal article supplement (PMC6135889; doi:10.3389/fneur.2018.00747), 2018-09-06
Supplement: Table_1.pdf [file Table_1.pdf]

## SUPPORTING INFORMATION

**S1 TABLE.** The 43 regions defined in the atlas for the DTI study. ROIs: regions of interest; SCP: superior cerebellar peduncle; L: left; R: right; ICP: inferior cerebellar peduncle; ICP: inferior cerebellar peduncle; CC: corpus callosum; IC: internal capsule.

| <b>Considered ROIs</b> |                                                    |
|------------------------|----------------------------------------------------|
| <b>Number</b>          | <b>Region</b>                                      |
| 1                      | Anterior thalamic radiation L                      |
| 2                      | Anterior thalamic radiation R                      |
| 3                      | Cortico-spinal tract L                             |
| 4                      | Cortico-spinal tract R                             |
| 5                      | Cingulum (cingulategyrus) L                        |
| 6                      | Cingulum (cingulategyrus) R                        |
| 7                      | Cingulum (hippocampus) L                           |
| 8                      | Cingulum (hippocampus) R                           |
| 9                      | Forceps major                                      |
| 10                     | Forceps minor                                      |
| 11                     | Inferior fronto-occipital fasciculus L             |
| 12                     | Inferior fronto-occipital fasciculus R             |
| 13                     | Inferior longitudinal fasciculus L                 |
| 14                     | Inferior longitudinal fasciculus R                 |
| 15                     | Superior longitudinal fasciculus L                 |
| 16                     | Superior longitudinal fasciculus R                 |
| 17                     | Uncinate fasciculus L                              |
| 18                     | Uncinate fasciculus R                              |
| 19                     | Superior longitudinal fasciculus (temporal part) L |
| 20                     | Superior longitudinal fasciculus (temporal part) R |
| 21                     | Genu of CC                                         |
| 22                     | Body of CC                                         |
| 23                     | Splenium of CC                                     |
| 24                     | ICP R                                              |
| 25                     | ICP L                                              |
| 26                     | SCP R                                              |
| 27                     | SCP L                                              |
| 28                     | Anterior limb of IC R                              |

|    |                                                               |
|----|---------------------------------------------------------------|
| 29 | Anterior limb of IC L                                         |
| 30 | Posterior limb of IC R                                        |
| 31 | Posterior limb of IC L                                        |
| 32 | Anterior corona radiata R                                     |
| 33 | Anterior corona radiata L                                     |
| 34 | Superior corona radiata R                                     |
| 35 | Superior corona radiata L                                     |
| 36 | Posterior corona radiata R                                    |
| 37 | Posterior corona radiata L                                    |
| 38 | External capsule R                                            |
| 39 | External capsule L                                            |
| 40 | Middle cerebellar peduncle and pontine crossing tract         |
| 41 | Fornix (column, body, cres with stria terminalis)             |
| 42 | Posterior thalamic radiation and retrolenticular part of IC R |
| 43 | Posterior thalamic radiation and retrolenticular part of IC L |
