# Supplementary material for: Functional and Structural Brain Damage in Friedreich's Ataxia
Source: PubMed Central journal article supplement (PMC6135889; doi:10.3389/fneur.2018.00747), 2018-09-06
Supplement: Table_2.pdf [file Table_2.pdf]

## SUPPORTING INFORMATION

**S2 TABLE.** Clinical signs and symptoms in the FRDA cohort. Number of patients affected (percentages). FRDA: Friedreich's Ataxia; CNS: central nervous system.

| <b>CNS involvement n (%)</b>    |           | <b>Onset Symptoms n (%)</b>  |            |
|---------------------------------|-----------|------------------------------|------------|
| Dysarthria                      | 18 (85.7) | Gait clumsiness,             | 14 (66.66) |
| Cerebellar signs                | 13 (61.9) | Cerebellar                   | 9 (42.85)  |
| Muscle weakness                 | 21 (100)  | Scoliosis                    | 8 (38.1)   |
| Muscle atonia                   | 20 (95.2) |                              |            |
| Babinski positive               | 21 (100)  |                              |            |
| Areflexia                       | 21 (100)  |                              |            |
| Nystagmus                       | 13 (61.9) |                              |            |
| <b>Sensory Impairment n (%)</b> |           | <b>Other n (%)</b>           |            |
| Vibratory sense                 | 21 (100)  | Left ventricular hypertrophy | 11 (52.38) |
| Touch                           | 10 (47.6) | Dysphagia                    | 17 (80.95) |
| Proprioception                  | 7 (33.3)  | Restrictive lung disease     | 3 (14.28)  |
| Pain                            | 5 ( 23.8) | Headache                     | 3 (14.3)   |
| Temperature                     | 4 (19%)   | Mood disorders               | 3 (14.3)   |
| Hearing loss                    | 3 (14.3)  | Diabetes Mellitus            | 2 (9.5)    |
