# Supplementary material for: Functional and Structural Brain Damage in Friedreich's Ataxia
Source: PubMed Central journal article supplement (PMC6135889; doi:10.3389/fneur.2018.00747), 2018-09-06
Supplement: Table_3.pdf [file Table_3.pdf]

**SUPPORTING INFORMATION**

**S3 TABLE.** Intelligence quotient of the cohort. FRDA: Friedreich's Ataxia; IQ: intelligent quotient; SD: standard deviation.

| <b>IQ</b>      | <b>FRDA</b> |           | <b>HC</b>   |           |
|----------------|-------------|-----------|-------------|-----------|
|                | <i>mean</i> | <i>SD</i> | <i>mean</i> | <i>SD</i> |
| IQ total       | 90,79       | 17,01     | 112,00      | 10,58     |
| IQ verbal      | 99,47       | 16,93     | 118,00      | 9,33      |
| IQ performance | 83,84       | 20,18     | 101,78      | 13,51     |
