# Supplementary material for: Functional and Structural Brain Damage in Friedreich's Ataxia
Source: PubMed Central journal article supplement (PMC6135889; doi:10.3389/fneur.2018.00747), 2018-09-06
Supplement: Table_4.pdf [file Table_4.pdf]

## SUPPORTING INFORMATION

S4 TABLE. Significant findings of the present study compared to the previous literature published in the Friedreich's Ataxia

|                                                    | <b>Present study/Findings</b>                                                                                                                                                         | <b>Accordance</b>                                                                                                                                                                                                                                         | <b>Different</b>                                                                                                                                                                                                                                 | <b>Novelty</b>                                             |
|----------------------------------------------------|---------------------------------------------------------------------------------------------------------------------------------------------------------------------------------------|-----------------------------------------------------------------------------------------------------------------------------------------------------------------------------------------------------------------------------------------------------------|--------------------------------------------------------------------------------------------------------------------------------------------------------------------------------------------------------------------------------------------------|------------------------------------------------------------|
| <b>Study design</b>                                | Multimodal study: VBM, DTI, fMRI with motor task                                                                                                                                      | <i>Dogan et al., 2016</i> : cognitive fMRI study                                                                                                                                                                                                          |                                                                                                                                                                                                                                                  | First three-modal study with fMRI motor-task               |
| <b>Scanner properties</b>                          | 3T                                                                                                                                                                                    | <i>Akhlaghi et al., 2011; Akhlaghi et al., 2012; Georgiou-Karistianis et al., 2012; Bonilha da Silva et al., 2014; Dogan et al., 2016; Harding et al., 2016; Rezende et al., 2016; Selvadurai et al., 2016</i>                                            | 7 T: <i>Solbach et al., 2014; Stefanescu et al., 2015</i>                                                                                                                                                                                        |                                                            |
| <b>Infratentorial regions GM – VBM</b>             | bilateral reduction of GM volume in lobule V, VI, VIII (L>R), the crus of cerebellum, in the vermis posterior lobe, both flocculi, L tonsil in FRDA                                   | <i>Della Nave et al., 2008b; França et al., 2009; Bonilha da Silva et al., 2014; Dogan et al., 2016; Rezende et al., 2016; Selvadurai et al., 2016</i>                                                                                                    | DN alteration: <i>Solbach et al., 2014</i>                                                                                                                                                                                                       | GM loss in the lobule VIII, flocculi bilaterally, L tonsil |
| <b>Supratentorial regions GM – VBM</b>             | No differences in cerebral GM volume                                                                                                                                                  | <i>Della Nave et al., 2008b; França et al., 2009</i>                                                                                                                                                                                                      | <i>Loss of GM: Bonilha da Silva et al., 2014; Dogan et al., 2016; Rezende et al., 2016; Selvadurai et al., 2016</i>                                                                                                                              |                                                            |
| <b>DTI WM</b>                                      | Diffuse FA reduction: deep cerebellar WM, cerebellar peduncles, CST (brainstem/PLIC/subcortical WM close to M1), posterior thalamic radiations and optic radiation, CC, forceps major | <i>Della Nave et al., 2008b; Della Nave et al., 2011; Rizzo et al., 2011; Clemm von Hohenberg et al., 2013; Vieira Karuta et al., 2015; Dogan et al., 2016; Rezende et al., 2016; Fortuna et al., 2008; Akhlaghi et al., 2014; Mascalchi et al., 2016</i> |                                                                                                                                                                                                                                                  |                                                            |
|                                                    | No differences of association tracts.                                                                                                                                                 |                                                                                                                                                                                                                                                           | FA reduction in the inferior fronto-occipital fasciculus ( <i>Della Nave et al., 2008b; Vieira Karuta et al., 2015; Dogan et al., 2016</i> ) and in the inferior longitudinal fasciculus ( <i>Della Nave et al., 2008b; Dogan et al., 2016</i> ) |                                                            |
| <b>DTI metrics correlation to disease severity</b> | In SCP, forceps, fornix                                                                                                                                                               | In cerebellar peduncles, CC: <i>Della Nave et al., 2008a; Rizzo et al., 2011; Clemm von Hohenberg et al., 2013; Rezende et al., 2016</i>                                                                                                                  | No correlations found: <i>Della Nave et al., 2011; Egger et al., 2014; Vieira Karuta et al., 2015; Mascalchi et al., 2016</i>                                                                                                                    |                                                            |
| <b>fMRI task</b>                                   | Bimanual task                                                                                                                                                                         | None                                                                                                                                                                                                                                                      | Single handed (dominant hand): <i>Mantovan et al., 2006; Akhlaghi et al., 2012; Ginestroni et al., 2012; Stefanescu et al., 2015; Harding et al., 2017</i>                                                                                       | First study to perform fMRI task with both hands in FRDA   |

|                                    |                                                                                                                                                                                                                  |                                                                                                      |                                                                                                                                                                                                                                                                               |                                                                                                                                      |
|------------------------------------|------------------------------------------------------------------------------------------------------------------------------------------------------------------------------------------------------------------|------------------------------------------------------------------------------------------------------|-------------------------------------------------------------------------------------------------------------------------------------------------------------------------------------------------------------------------------------------------------------------------------|--------------------------------------------------------------------------------------------------------------------------------------|
| <b>Intragroup analysis of fMRI</b> | R-hand task (dominant): activation in L M1, L insula, R superior cerebellar hemisphere (lobules V, VI, VIII). L-hand task: activation of R M1, R insula, L superior cerebellar hemisphere (lobules V, VII, VIII) | <i>Akhlaghi et al., 2012; Ginestroni et al., 2012; Stefanescu et al., 2015; Harding et al., 2017</i> |                                                                                                                                                                                                                                                                               |                                                                                                                                      |
| <b>Intergroup analysis of fMRI</b> | Differences only during non-dominant hand task: stronger activation in the L superior cerebellar hemisphere in Hcs. No significant differences were found during the movement of the dominant hand               |                                                                                                      | Reduction of activation in M1, thalamus, DN and lobule V ( <i>Ginestroni et al., 2012; Stefanescu et al., 2015</i> ), increase of activation in parietal cortex, striatum, SMA, lobule VII ( <i>Akhlaghi et al., 2012; Ginestroni et al., 2012; Stefanescu et al., 2015</i> ) | Significant difference during the non-dominant hand motor task, a stronger activation in the L superior cerebellar hemisphere in HCs |

Legend: GM: Grey Matter, VBM: Voxel Based Morphometry; DTI: Diffusion tensor Imaging; fMRI: functional Magnetic Resonance Imaging; T:

Tesla; L: left, R: right; FA: Fractional Anisotropy, PLIC: posterior limb internal capsule, CST: cortical spinal tracts; WM: White Matter; MD: Medial

Diffusivity; CC: corpus callosum; SCP: superior cerebellar peduncles; HCs: healthy controls; DN: dentate nucleus; SMA: supplementary motor area;
